# Supplementary material for: Resting State Functional Connectivity Biomarkers of Treatment Response in Mood Disorders: A Review
Source: Front Psychiatry. 2021 Mar 26;12:565136. doi: 10.3389/fpsyt.2021.565136 (PMC8032870; doi:10.3389/fpsyt.2021.565136)
Supplement: Supplementary file 1 [file Table_1.XLSX]

## Sheet: Reference Region
Treatment Modality	Study	Technique	Highlighted RSFC Predictors or Changes
ECT	Abbott et al. 2013	ICA	DMN, DLPFC
	Abbott et al. 2014	Seed-based	R hippocampus
	Argyelan et al. 2016	Other	ACC
	Beall et al. 2012	Seed-based	ACC, R DLPFC, PCC
	Cano et al. 2016	Seed-based	ACC, limbic-prefrontal regions
	Leaver et al. 2016	Seed-based	dACC, R hippoampus, thalamus, mPFC, parietal cortex
	Leaver et al. 2018	Other	frontoparietal networks, motor networks, tmeporal networks, ACC
	Mulders et al. 2016	Other	precuneus, angular gyrus
	Thomann et al. 2017	Seed-based	R amygdala, R TPJ, MPFC, insula, R DLPFC, hypothalamus
	van Waarde et al. 2015	Other	DMPFC, DLPFC, OFC, PCC
Ketamine	Gartner et al. 2019	Seed-based	rACC, R DLPFC
	Abdallah et al. 2016	Graph Theory	global brain connectivity, lateral PFC, caudate, insula
Mood Stabilizers	Altinay et al. 2018	Seed-based	OFC, L amygdala
	Dandash et al. 2018	Seed-based	corticostriatal systems
	Spielberg et al. 2019	Graph Theory	mania-related connectome indices, R amygdala
Neuroleptics	Altinay et al. 2016	Seed-based	L amygdala, superior/middle occipital gyri, mid-cingulate
	Dandash et al. 2018	Seed-based	corticostriatal systems
Psychotherapy	Chattopadhyay et al. 2017	Seed-based	R insula, L supragenual ACC
	Crowther et al. 2015	Seed-based	R insula, R middle temporal gyrus
	Dunlop et al. 2017	Seed-based	dACC, VLPFC, VMPFC, insula, dorsal midbrain
	Ellard et al. 2018	Seed-based	R insula, R VLPFC, amygdala
	Schneider et al. 2019	Other	R inferior frontal gyrus, L inferior parietal lobule, L insula, L precuneus, R caudate
	Shou et al. 2017	ICA	DMN
	Straub et al. 2017	Seed-based	rACC, amygdala, left DLPFC, and left anterior insula
Psychedelic	Carhart-Harris et al. 2017	Seed-based	rACC, PCC, precuneous
Real-Time Feedback	Young et al. 2018	Seed-based	amygdala, hippocampus
	Yuan et al. 2014	Seed-based	amygdala, precuneus
SSRIs/SNRIs	Anand et al. 2019	Seed-based	ventral tegmental area, cuneus-occipital areas
	Alexopoulos et al. 2012	Seed-based	dACC, CCN
	Anand et al. 2005	Seed-based	dACC, limbic regions
	Anand et al. 2007	Seed-based	dACC, limbic regions
	Andreescu et al. 2013	Seed-based	dACC, CCN
	Chin Fatt et al. 2020	ICA	DMN, CEN
	Cullen et al. 2016	Seed-based	amygdala, middle frontal gyri, R posterior cingulate, precuneus
	Dunlop et al. 2017	Seed-based	dACC, VLPFC, VMPFC, insula, dorsal midbrain
	Dutta et al. 2019	ICA	DMN, amygdala
	Fu et al. 2016	ICA	DMN, OFC
	Ge et al. 2017	ICA	DMN, VMPFC, salience network
	Karim et al. 2017	Graph Theory	R precentral gyrus, CEN, R inferior frontal gyrus, supramarginal gyrus, DMN
	Klimes-Dougan et al. 2018	Seed-based	amygdala, R central parietal opercular cortex, Heschl’s gyrus
	Kozel et al. 2012	Seed-based	dACC, ACC
	Langenecker et al. 2019	Seed-based	amygdala, OFC
	Langenecker et al. 2019	Seed-based	DLPFC, bilateral middle frontal and inferior parietal
	Patel et al. 2015	Other	DMN
	Posner et al. 2013	Graph Theory	PCC, R lateral pareital cortex, R inferior temporal gyrus
	Tadayonnejad et al. 2016	Other	pulvinar, DMN, insula
	Wagner et al. 2017	Seed-based	dorsal raphe, precuneus, angular gyrus, cerebellum, locus coeruleus, precentral gyrus, parahippocampal gyrus
TMS	Avissar et al. 2017	Seed-based	left DLPFC, striatum
	Baeken et al. 2017	Seed-based	rACC, M OFC
	Cash et al. 2019	Other	caudate, prefrontal cortex, thalamus
	Downar et al. 2014	Graph Theory	DMPFC, R amygdala, ventral striatum, temporal pole
	Fox et al. 2012	Seed-based	rACC, L DLPFC
	Iwabuchi et al. 2019	ICA	salience network
	Iwabuchi et al. 2019	ICA	fronto-insular
	Kang et al. 2016	Seed-based	L DLPFC, left caudate
	Liston et al. 2014	Seed-based	rACC, VMPFC, DMPFC, dACC, PCC
	Salomons et al. 2014	Seed-based	rACC, DLPFC, insula, putamen, parahippocampus, amygdala
